# Supplementary material for: Longitudinal metagenomic insights into soil, bark, and berry microbiomes under abandoned, bio- organic, and conventional cultivation in Tokaj vineyard
Source: Research Square preprint supplement (doi:10.21203/rs.3.rs-7591151/v1), 2025-11-05
Supplement: Supplementary file 1 [file 29b10aa3a0701d22271219b2.xlsx]

## Sheet: Sheet1
Supplementary File 6. Detailed physicochemical characterization of the soil samples from the three differently managed vineyard sites
Parameters	Abandoned	Conventional	Bio-organic
pH (KCl 1:2,5) [-]	7.05	7.37	7.11
Arany plasticity index [KA]	51.7241	40	40.5405
Total water-soluble salt [m/m%]	0.033026	<0,02	<0,02
CaCO3 [m/m%]	4	5.5	6.5
Humus [m/m%]	1.60969	0.864931	1.17888
KCl-soluble N-NO₂⁻+NO₃⁻ [mg/kg]	5.1886	5.97546	8.80856
KCl-soluble Mg [mg/kg]	75.36	98.46	73.35
KCl-soluble S [mg/kg]	1.64	1.75	2.51
Al-soluble K2O (mg/kg) [mg/kg]	635.508	401.605	245.56
Al-soluble Na (mg/kg) [mg/kg]	21.1743	25.5953	22.077
Al-soluble P2O5 [mg/kg]	481.721	740.572	475.777
EDTA-soluble Cu [mg/kg]	12.01	6.383	9.204
EDTA-soluble Mn [mg/kg]	177.4	66.25	102
EDTA-soluble Zn [mg/kg]	4.371	2.504	2.871
Measurement methodologies
Test name	Method	Device
pH (KCl 1:2,5)	MSZ-08-0206-2:1978 2.1. section	WTW inolab pH7310 pH meter
Arany plasticity index [KA]	MSZ-08-0205:1978 5. chapter	VOS PB S40 Mixing motor
Total water-soluble salt [m/m%]	MSZ-08-0206-2:1978 2.4. section	WTW Cond 7110 conductivity meter TetraCon 325/S electrode
CaCO3 [m/m%]	MSZ-08-0206-2:1978 2.2. section	K-10 calcimeter
Humus [m/m%]	MSZ 08-0210:1977 MSZ-08-0452: 1980	Thermo Scientific Evolution 60s UV-Visible spectrometer
KCl-soluble N-NO₂⁻+NO₃⁻ [mg/kg]	MSZ 20135:1999. 4.2.2. section EPA 353.1:1978	Thermo Scientific Gallery discrete analyzer
KCl-soluble Mg [mg/kg]	MSZ 20135:1999 4.2.2., 5.1. section	Thermo Scientific iCAP 6300 Radial View ICP-OES spectrometer
KCl-soluble S [mg/kg]	MSZ 20135:1999 4.2.2., 5.1. section
Al-soluble K2O (mg/kg) [mg/kg]	MSZ 20135:1999 4.2.1., 5.1. section
Al-soluble Na (mg/kg) [mg/kg]	MSZ 20135:1999. 4.2.1., 5.1. section
Al-soluble P2O5 [mg/kg]	MSZ 20135:1999. 4.2.1., 5.1. section
EDTA-soluble Cu [mg/kg]	MSZ 20135:1999 4.2.3., 5.1. section
EDTA-soluble Mn [mg/kg]	MSZ 20135:1999 4.2.3., 5.1.section
EDTA-soluble Zn [mg/kg]	MSZ 20135:1999 4.2.3., 5.1. section
Sample preparation (drying, grinding)	MSZ-08-0206-1:1978	Traceable digital humidity and temperature meter Hammer mill
