# Supplementary material for: Longitudinal metagenomic insights into soil, bark, and berry microbiomes under abandoned, bio- organic, and conventional cultivation in Tokaj vineyard
Source: Research Square preprint supplement (doi:10.21203/rs.3.rs-7591151/v1), 2025-11-05
Supplement: Supplementary file 2 [file 518e4357f244ff6c79b4bcc3.xlsx]

## Sheet: Munka1
Supplementary File1. List of bacterial and fungal key species with a MeanDeacreaseAccuracy (MDA) > 3, that are considered as key discriminatory species (KDS).
Bacterial species	MeanDecreaseAccuracy		Fungal species	MeanDecreaseAccuracy
Kineococcus rubinsiae	5.4498224197		Lophiotrema nucula	6.4906391738
Rhodoferax koreense	5.1748592973		Karstenula rhodostoma	4.9249376577
Actinoplanes ferrugineus	4.3859481202		Exophiala sideris	4.5279669286
Actinoplanes friuliensis	4.186767142		Lophiostoma macrostomum	4.1877484512
Catenuloplanes japonicus	4.149001502		Exophiala xenobiotica	4.1330713811
Actinoplanes auranticolor	4.1405247488		Exophiala oligosperma	3.8152624758
Actinoplanes digitatis	4.1085070906		Friedmanniomyces simplex	3.6088096461
Geminicoccus roseus	4.0828892562
Rubellimicrobium mesophilum	4.0170144991
Actinoplanes toevensis	3.8634898374
Nocardioides anomalus	3.8247669155
Actinoplanes humidus	3.7242633909
Nocardioides halotolerans	3.6351894935
Escherichia coli	3.4919994218
Terriglobus roseus	3.3547433485
Nakamurella flavida	3.3015417062
Schlegelella koreensis	3.0257351738
