# Supplementary material for: Longitudinal metagenomic insights into soil, bark, and berry microbiomes under abandoned, bio- organic, and conventional cultivation in Tokaj vineyard
Source: Research Square preprint supplement (doi:10.21203/rs.3.rs-7591151/v1), 2025-11-05
Supplement: Supplementary file 3 [file 546abb3a5fee854e07211227.xlsx]

## Sheet: Munkalap1
Supplementary File4. List of annotated genes contributing to the six biologically meaningful categories
No.	KEGG ID	gene id	gene name	ID	veraison	harvest
1.	K00656	aat1	formate C-acetyltransferase [EC:2.3.1.54]	aroma compound biosynthesis	0.0003422829	0
2.	K03516	lsrACDBFGE	flagellar protein FlhE	quorum sensing and biofilm formation	0.0001247672	0
3.	K19416	epsA-O klaszter	modulator of FtsH protease	quorum sensing and biofilm formation	0.0004400609	0
4.	K19418	epsA-O klaszter	membrane protein EpsK	quorum sensing and biofilm formation	0.270237427	0
5.	K19420	epsA-O klaszter	protein tyrosine kinase EpsB modulator	quorum sensing and biofilm formation	6.3006504264	0
6.	K19422	epsA-O klaszter	glycosyltransferase EpsD [EC:2.4.-.-]	quorum sensing and biofilm formation	4.107e-06	0
7.	K19489	pelA/B/C	doublesex- and mab-3-related transcription factor 2	quorum sensing and biofilm formation	1.0487409253	0
8.	K19490	pelA/B/C	doublesex- and mab-3-related transcription factor 3	quorum sensing and biofilm formation	0.7929179362	0
9.	K05604	hcnA	beta-Ala-His dipeptidase [EC:3.4.13.20]	antagonistic bioprotective traits	0	4.119e-06
10.	K06135	PhzS	pyrroloquinoline quinone biosynthesis protein A	phytotoxin biosynthesis	0	1.172e-06
11.	K19426	epsA–O klaszter	pyruvyl transferase EpsI [EC:2.-.-.-]	quorum sensing and biofilm formation	0	0.7106779594
12.	K19427	epsA–O klaszter	glycosyltransferase EpsJ [EC:2.4.-.-]	quorum sensing and biofilm formation	0	0.000156384
13.	K19428	epsA–O klaszter	sugar transferase EpsL [EC:2.-.-.-]	quorum sensing and biofilm formation	0	3.5357e-05
14.	K19488	pelA/B/C	doublesex- and mab-3-related transcription factor 1	quorum sensing and biofilm formation	0	1.031e-06
