# Supplementary material for: Longitudinal metagenomic insights into soil, bark, and berry microbiomes under abandoned, bio- organic, and conventional cultivation in Tokaj vineyard
Source: Research Square preprint supplement (doi:10.21203/rs.3.rs-7591151/v1), 2025-11-05
Supplement: Supplementary file 4 [file 5631f4afc345571fb27d9636.xlsx]

## Sheet: Munka1
Supplementary File 5. Samples ranking as low, medium or high metabolic potential based on their total estimated metabolic activity across eight predicted pathways
Sample ID	Cumulative relative frequency	Metabolic activity
BeBo06/07/20	0.276462371926253	High
BeBo01/09/20	0.246241533707795	Low
BeBo05/10/20	0.251705200305129	Low
BeBo21/07/21	0.260477805032381	Medium
BeBo02/09/21	0.271710265517694	Medium
BeAb06/07/20	0.283753358426463	High
BeAb01/09/20	0.283910510859731	High
BeAb05/10/20	0.295332275072399	High
BeAb21/07/21	0.275316791934343	High
BeAb02/09/21	0.257312638758497	Low
BeCo06/07/20	0.266266478609815	Medium
BeCo01/09/20	0.273919221841286	High
BeCo05/10/20	0.266600803159701	Medium
BeCo21/07/21	0.263156338170823	Medium
BeCo02/09/21	0.270724499651873	Medium
