# Supplementary material for: Longitudinal metagenomic insights into soil, bark, and berry microbiomes under abandoned, bio- organic, and conventional cultivation in Tokaj vineyard
Source: Research Square preprint supplement (doi:10.21203/rs.3.rs-7591151/v1), 2025-11-05
Supplement: Supplementary file 5 [file 91d5e465b43d80e06388156d.xlsx]

## Sheet: Munka1
Supplementary File3. List of bioprotective species and their relative abundance in each category
Species	2020	2021	Veraison 2020	Harvest 2020	Veraison 2021	Harvest 2021	Abandoned	Bio-organic	Conventional
Aureobasidium pullulans	0.0119473322777778	0.0383869714333333	0.00785763125	0.0201267343333333	0.0262524635666667	0.0361095595333333	0.00561332016	0.0323137174	0.02964252626
Pantoea agglomerans	0.00189781301111111	0.00028987025	0.0021265509	0.00144033723333333	0.0014604188	0.0000702962333333333	0.00161794912	0.00005157388	0.00209438472
Bacillus subtilis	4.19032037042013E-08	4.01576786791372E-07	0	1.25709611112604E-07	1.25709611112604E-07	8.03153573582744E-07	4.81892144149646E-07	0	7.54257666675623E-08
Pseudomonas fluorescens	0.0000277411752772917	0.0000011582893965208	0.0000397262268386113	3.77107215465249E-06	4.20222295973066E-06	0	0.0000248573790482267	0.0000218185996007653	4.64808412595804E-06
Sphingomonas melonis	0.000001551	2.46016666666667E-07	0.000001021	0.000002611	1.57666666666667E-07	4.92033333333333E-07	0.000002682	0.00000030122	0.0000001038
Sphingomonas phyllosphaerae	1.84434444444444E-06	0.00000024305	3.71516666666667E-07	0.00000479	9.67333333333333E-08	4.66033333333333E-07	0.00000330432	0.00000026116	0.000000046
Sphingomonas endophytica	0.0000044741	1.04183333333333E-07	4.08816666666667E-07	0.0000126046666666667	0.0000000867	1.65333333333333E-07	0.0000080506	0.0000001016	0.0000000262
