# Supplementary material for: Longitudinal metagenomic insights into soil, bark, and berry microbiomes under abandoned, bio- organic, and conventional cultivation in Tokaj vineyard
Source: Research Square preprint supplement (doi:10.21203/rs.3.rs-7591151/v1), 2025-11-05
Supplement: Supplementary file 6 [file d64cc40962ed8c11d0d3cbb9.xlsx]

## Sheet: Munka1
Supplementary File 2. List of habitat-specific and core species
Core bacterial and fungal species					Bark specific bacterial and fungal species				Berry specific bacterial and fungal species
Species	Relative abundance in bark	Relative abundance in berry	Group		Species	Relative abundance	Group		Species	Relative abundance	Group
Escherichia coli	1.79E-006	3.20E-006	Bacteria		Microlunatus spumicola	0.0003754959	Bacteria		Pantoea agglomerans	0.0012548194	Bacteria
Hymenobacter crusticola	3.40E-005	0.000000713	Bacteria		Nakamurella flava	0.0002404299	Bacteria		Erwinia gerundensis	0.0001182501	Bacteria
Kineococcus rubinsiae	4.31E-005	6.41E-007	Bacteria		Nakamurella flavida	0.00021	Bacteria		Clavibacter michiganensis	0.0000732	Bacteria
Microlunatus antarcticus	0.0005205722	2.58E-006	Bacteria		Nakamurella deserti	0.000209	Bacteria		Pseudokineococcus lusitanus	0.0000693	Bacteria
Siccationidurans ginsengisoli	3.76E-006	1.33E-006	Bacteria		Spirosoma endophyticum	0.0002065041	Bacteria		Pseudomonas coleopterorum	0.0000611	Bacteria
Sphingomonas aurantiaca	1.37E-006	3.21E-006	Bacteria		Hansschlegelia quercus	0.0001792108	Bacteria		Pseudomonas syringae	0.0000491	Bacteria
Sphingomonas ginsenosidivorax	6.43E-006	1.85E-005	Bacteria		Naasia lichenicola	0.000177	Bacteria		Massilia aurea	0.000037912	Bacteria
Sphingomonas rubra	1.33E-006	6.93E-007	Bacteria		Skermanella aerolata	0.000113	Bacteria		Tatumella saanichensis	0.000029996	Bacteria
Alternaria alternata	0.00000196	0.0000898	Fungi		Paeniroseomonas aquatica	0.0001035521	Bacteria		Gluconobacter wancherniae	0.0000187	Bacteria
Aureobasidium melanogenum	2.97163311768038E-06	0.000126	Fungi		Dankookia rubra	0.000096	Bacteria		Asaia platycodi	0.000014	Bacteria
Aureobasidium pullulans	0.0000245952762868391	0.0225231879	Fungi		Catenuloplanes japonicus	0.0000726	Bacteria		Pseudomonas viridiflava	0.0000137	Bacteria
Hortaea werneckii	0.00004305866583117	0.000600386	Fungi		Microlunatus flavus	0.0000662	Bacteria		Xylophilus rhododendri	0.0000129	Bacteria
Podosphaera aphanis	0.00000174	0.0000722723034046843	Fungi		Sphingomonas aerophila	0.0000599	Bacteria		Gluconobacter cerinus	0.000010591	Bacteria
Sclerotinia sclerotiorum	0.00000172	0.000035	Fungi		Modestobacter marinus	0.0000576	Bacteria		Pseudomonas baltica	0.0000102	Bacteria
					Spirosoma pollinicola	0.0000512	Bacteria		Tatumella ptyseos	0.00000926	Bacteria
					Terriglobus roseus	0.0000474	Bacteria		Serratia rubidaea	0.00000545	Bacteria
					Friedmanniella luteola	0.0000455	Bacteria		Pseudomonas oryzihabitans	0.000004	Bacteria
					Mucilaginibacter arboris	0.0000411	Bacteria		Rhizobium soli	0.00000399	Bacteria
					Segetibacter koreensis	0.0000396	Bacteria		Pseudomonas putida	0.00000371	Bacteria
					Terrihabitans soli	0.0000358	Bacteria		Sphingomonas aerolata	0.00000358	Bacteria
					Microlunatus sagamiharensis	0.0000259	Bacteria		Pseudomonas psychrotolerans	0.00000352	Bacteria
					Actinomycetospora corticicola	0.0000252	Bacteria		Pseudomonas graminis	0.00000303	Bacteria
					Sphingomonas crusticola	0.0000244	Bacteria		Sphingomonas endophytica	0.00000273	Bacteria
					Roseomonas nepalensis	0.0000237	Bacteria		bacteria symbiont BFo1 of Frankliniella occidentalis	0.00000272	Bacteria
					Actinoplanes auranticolor	0.0000232	Bacteria		Vibrio parahaemolyticus	0.00000269	Bacteria
					Actinomycetospora cinnamomea	0.0000198	Bacteria		Paenibacillus nicotianae	0.00000254	Bacteria
					Actinomycetospora succinea	0.0000177	Bacteria		Massilia forsythiae	0.00000247	Bacteria
					Nakamurella multipartita	0.0000166	Bacteria		Kineococcus radiotolerans	0.00000238	Bacteria
					Microvirga pudoricolor	0.0000158	Bacteria		Hymenobacter setariae	0.00000193	Bacteria
					Modestobacter versicolor	0.0000158	Bacteria		Enterobacter ludwigii	0.00000191	Bacteria
					Nocardioides panacis	0.000014275	Bacteria		Kineococcus rhizosphaerae	0.00000169	Bacteria
					Spirosoma radiotolerans	0.0000141	Bacteria		Pseudomonas rhizosphaerae	0.000001629	Bacteria
					Longimicrobium terrae	0.0000134	Bacteria		Pantoea ananatis	0.00000145	Bacteria
					Actinoplanes friuliensis	0.0000123	Bacteria		Salmonella enterica	0.00000141	Bacteria
					Pseudoduganella plicata	0.0000115	Bacteria		Leclercia adecarboxylata	0.0000014	Bacteria
					Segetibacter aerophilus	0.0000112	Bacteria		Aureimonas pseudogalii	0.000001388	Bacteria
					Gemmatirosa kalamazoonesis	0.0000104	Bacteria		Erwinia aphidicola	0.00000126	Bacteria
					Roseomonas aerilata	0.0000102	Bacteria		Asaia siamensis	0.000001213	Bacteria
					Nakamurella panacisegetis	0.00000972	Bacteria		Hymenobacter nivis	0.0000012	Bacteria
					Sphingomonas solaris	0.00000953	Bacteria		Sphingomonas phyllosphaerae	0.0000012	Bacteria
					Schlegelella koreensis	0.00000916	Bacteria		Pseudomonas aeruginosa	0.00000119	Bacteria
					Microlunatus capsulatus	0.00000877	Bacteria		Saccharibacillus endophyticus	0.000001186	Bacteria
					Hymenobacter cyanobacteriorum	0.00000875	Bacteria		Rhizobium leguminosarum	0.000001141	Bacteria
					Sphingomonas profundi	0.000007987	Bacteria		Aerococcus urinae	0.00000109	Bacteria
					Couchioplanes caeruleus	0.000007881	Bacteria		Sphingomonas melonis	0.00000103	Bacteria
					Actinoplanes ferrugineus	0.0000074	Bacteria		Labedella gwakjiensis	0.000001	Bacteria
					Belnapia moabensis	0.00000731	Bacteria		Pseudomonas monteilii	0.000000912	Bacteria
					Sphingomonas kaistensis	0.00000716	Bacteria		Rhizobium cellulosilyticum	0.000000867	Bacteria
					Klenkia terrae	0.00000709	Bacteria		Roseomonas aerophila	0.000000831	Bacteria
					Modestobacter muralis	0.00000656	Bacteria		Klebsiella pneumoniae	0.000000818	Bacteria
					Actinoplanes rectilineatus	0.00000654	Bacteria		Siccationidurans soli	0.000000814	Bacteria
					Modestobacter altitudinis	0.00000604	Bacteria		Brucella melitensis	0.000000739	Bacteria
					Belnapia rosea	0.00000599	Bacteria		Sphingomonas faeni	0.000000739	Bacteria
					Actinoplanes rishiriensis	0.00000593	Bacteria		Xanthomonas arboricola	0.000000667	Bacteria
					Ilyomonas limi	0.00000587	Bacteria		Sphingomonas taxi	0.000000658	Bacteria
					Hymenobacter cavernae	0.00000583	Bacteria		Arsenophonus endosymbiont of Bemisia tabaci	0.000000626	Bacteria
					Spirosoma validum	0.00000572	Bacteria		Hanseniaspora uvarum	0.0085646521	Fungi
					Actinoplanes nipponensis	0.00000525	Bacteria		Filobasidium floriforme	0.0003190585
					Actinoplanes humidus	0.000004933	Bacteria		Botrytis cinerea	0.0002774126
					Enterovirga rhinocerotis	0.00000492	Bacteria		Venturia nashicola	0.0001702811
					Cryptosporangium arvum	0.000004639	Bacteria		Monilinia fructigena	0.000109
					Spirosoma linguale	0.00000462	Bacteria		Erysiphe necator	0.0000973
					Limnoglobus roseus	0.00000462	Bacteria		Erysiphe pulchra	0.0000475
					Humisphaera borealis	0.00000453	Bacteria		Sydowia polyspora	0.000037801
					Pseudonocardia sediminis	0.00000451	Bacteria		Plasmopara viticola	0.0000297
					Actinomycetospora callitridis	0.0000043	Bacteria		Epicoccum nigrum	0.0000248
					Modestobacter excelsi	0.00000425	Bacteria		Golovinomyces magnicellulatus	0.0000245
					Microlunatus phosphovorus	0.00000408	Bacteria		Golovinomyces cichoracearum	0.0000224
					Rhodocytophaga rosea	0.00000407	Bacteria		Rachicladosporium antarcticum	0.0000214
					Roseomonas pecuniae	0.00000401	Bacteria
					Actinomycetospora chiangmaiensis	0.00000399	Bacteria
					Blastococcus endophyticus	0.00000379	Bacteria
					Fimbriimonas ginsengisoli	0.00000338	Bacteria
					Nakamurella endophytica	0.00000321	Bacteria
					Lichenihabitans psoromatis	0.0000032	Bacteria
					Skermanella pratensis	0.00000318	Bacteria
					Actinoplanes toevensis	0.00000311	Bacteria
					Spirosoma fluviale	0.00000299	Bacteria
					Nocardioides halotolerans	0.00000292	Bacteria
					Cryptosporangium aurantiacum	0.00000285	Bacteria
					Lichenifustis flavocetrariae	0.00000273	Bacteria
					Pseudonocardia spinosispora	0.00000273	Bacteria
					Gemmatirosa kalamazoonensis	0.0000027	Bacteria
					Microlunatus panaciterrae	0.00000266	Bacteria
					Sphingomonas gellani	0.00000265	Bacteria
					Actinomycetospora soli	0.00000233	Bacteria
					Hymenobacter ginkgonis	0.00000233	Bacteria
					Rubellimicrobium mesophilum	0.00000228	Bacteria
					Microvirga ossetica	0.00000224	Bacteria
					Parafilimonas terrae	0.00000222	Bacteria
					Angustibacter aerolatus	0.00000218	Bacteria
					Spirosoma agri	0.00000207	Bacteria
					Siccirubricoccus deserti	0.00000204	Bacteria
					Skermanella stibiiresistens	0.00000196	Bacteria
					Spirilliplanes yamanashiensis	0.00000192	Bacteria
					Skermanella mucosa	0.00000191	Bacteria
					Granulicella aggregans	0.00000191	Bacteria
					Nocardioides anomalus	0.00000189	Bacteria
					Actinoplanes tereljensis	0.00000188	Bacteria
					Aeromicrobium endophyticum	0.00000185	Bacteria
					Belnapia arida	0.0000018	Bacteria
					Hymenobacter polaris	0.00000177	Bacteria
					Hymenobacter ruricola	0.00000177	Bacteria
					Sphingomonas glacialis	0.00000174	Bacteria
					Geminicoccus roseus	0.00000174	Bacteria
					Actinomycetospora chibensis	0.00000171	Bacteria
					Belnapia mucosa	0.00000165	Bacteria
					Adhaeribacter pallidiroseus	0.00000164	Bacteria
					Sphingomonas jatrophae	0.00000159	Bacteria
					Hyalangium minutum	0.00000158	Bacteria
					Rhodopseudomonas palustris	0.00000157	Bacteria
					Roseomonas deserti	0.00000156	Bacteria
					Rhodoferax koreense	0.00000154	Bacteria
					Actinoplanes digitatis	0.00000152	Bacteria
					Blastococcus saxobsidens	0.00000146	Bacteria
					Nocardioides flavescens	0.00000139	Bacteria
					Sphingomonas donggukensis	0.00000139	Bacteria
					Sphingomonas hylomeconis	0.00000135	Bacteria
					Deinococcus aquiradiocola	0.00000135	Bacteria
					Pseudolysinimonas yzui	0.000001334	Bacteria
					Actinomycetospora endophytica	0.00000129	Bacteria
					Marmoricola aurantiacus	0.00000129	Bacteria
					Mucilaginibacter galii	0.00000128	Bacteria
					Desertihabitans aurantiacus	0.00000128	Bacteria
					Sphingomonas guangdongensis	0.00000125	Bacteria
					Actinoplanes durhamensis	0.00000122	Bacteria
					Lophiostoma macrostomum	0.0005131342	Fungi
					Lophiotrema nucula	0.000237	Fungi
					Heterodermia speciosa	0.0001775517	Fungi
					Microthyrium microscopicum	0.000161	Fungi
					Exophiala sideris	0.000072313	Fungi
					Pyrenophora tritici-repentis	0.0000352	Fungi
					Friedmanniomyces endolithicus	0.0000307	Fungi
					Phaeomoniella chlamydospora	0.0000288	Fungi
					Parastagonospora nodorum	0.0000258	Fungi
					Physcia stellaris	0.000024995	Fungi
					Friedmanniomyces simplex	0.0000241	Fungi
					Lentithecium fluviatile	0.0000174	Fungi
					Lasallia pustulata	0.0000131	Fungi
					Melanomma pulvis-pyrius	0.0000129	Fungi
					Niorma chrysophthalma	0.00000999	Fungi
					Zopfia rhizophila	0.00000937	Fungi
					Trematosphaeria pertusa	0.00000899	Fungi
					Gomphillus americanus	0.0000085	Fungi
					Periconia macrospinosa	0.00000662	Fungi
					Neohortaea acidophila	0.0000064	Fungi
					Fusarium oxysporum	0.00000564	Fungi
					Imshaugia aleurites	0.00000562	Fungi
					Polyplosphaeria fusca	0.00000548	Fungi
					Alectoria fallacina	0.000005456	Fungi
					Orbilia oligospora	0.00000513	Fungi
					Lindgomyces ingoldianus	0.00000506	Fungi
					Massariosphaeria phaeospora	0.00000462	Fungi
					Diplodia seriata	0.00000447	Fungi
					Endocarpon pusillum	0.00000437	Fungi
					Pyrenophora teres	0.00000427	Fungi
					Amniculicola lignicola	0.00000379	Fungi
					Westerdykella ornata	0.00000379	Fungi
					Tothia fuscella	0.00000367	Fungi
					Didymosphaeria enalia	0.00000355	Fungi
					Aaosphaeria arxii	0.00000352	Fungi
					Clohesyomyces aquaticus	0.00000346	Fungi
					Cucurbitaria berberidis	0.0000034	Fungi
					Byssothecium circinans	0.00000337	Fungi
					Ophiobolus disseminans	0.00000301	Fungi
					Corynespora cassiicola	0.00000281	Fungi
					Flavoplaca oasis	0.00000273	Fungi
					Cenococcum geophilum	0.00000256	Fungi
					Dactylella cylindrospora	0.00000255	Fungi
					Pleomassaria siparia	0.0000025	Fungi
					Mytilinidion resinicola	0.00000246	Fungi
					Karstenula rhodostoma	0.00000241	Fungi
					Baudoinia panamericana	0.00000236	Fungi
					Rhizodiscina lignyota	0.00000219	Fungi
					Exophiala xenobiotica	0.00000211	Fungi
					Hirsutella minnesotensis	0.00000208	Fungi
					Zasmidium cellare	0.00000207	Fungi
					Sporormia fimetaria	0.00000203	Fungi
					Letharia columbiana	0.00000197	Fungi
					Diploschistes diacapsis	0.00000184	Fungi
					Bimuria novae-zelandiae	0.00000179	Fungi
					Aspergillus hiratsukae	0.00000168	Fungi
					Sticta canariensis	0.00000168	Fungi
					Viridothelium virens	0.00000163	Fungi
					Lizonia empirigonia	0.00000162	Fungi
					Setomelanomma holmii	0.00000162	Fungi
					Cudoniella acicularis	0.00000158	Fungi
					Massarina eburnea	0.00000152	Fungi
					Piccolia ochrophora	0.00000147	Fungi
					Coniochaeta ligniaria	0.00000145	Fungi
					Cryomyces minteri	0.00000145	Fungi
					Lophium mytilinum	0.00000145	Fungi
					Letharia lupina	0.00000142	Fungi
					Coniosporium apollinis	0.00000141	Fungi
					Oidiodendron maius	0.0000014	Fungi
					Lepidopterella palustris	0.00000139	Fungi
					Pestalotiopsis fici	0.00000137	Fungi
					Dendryphion nanum	0.00000133	Fungi
					Macrophomina phaseolina	0.00000132	Fungi
					Dothidotthia symphoricarpi	0.0000013	Fungi
					Exophiala oligosperma	0.00000129	Fungi
					Armillaria ostoyae	0.00000127	Fungi
					Talaromyces stipitatus	0.00000126	Fungi
					Paraphaeosphaeria minitans	0.00000125	Fungi
					Didymella exigua	0.00000123	Fungi
					Paraphaeosphaeria sporulosa	0.00000123	Fungi
					Chalara longipes	0.0000012	Fungi
					Aulographum hederae	0.00000118	Fungi
					Verruconis gallopava	0.00000117	Fungi
					Clathrospora elynae	0.00000116	Fungi
					Glonium stellatum	0.00000112	Fungi
					Fusarium graminearum	0.0000011	Fungi
					Trichodelitschia bisporula	0.00000109	Fungi
					Cladophialophora immunda	0.00000108	Fungi
					Stictis urceolata	0.00000108	Fungi
					Fusarium avenaceum	0.00000106	Fungi
